# Supplementary material for: Red blood cell acetylcholinesterase activity among healthy dwellers of an agrarian region in Sri Lanka: a descriptive cross-sectional study
Source: Springer Nature journal article supplement (doi:10.1186/s12199-018-0717-0), 2018-06-21
Supplement: MOESM2 [file 15865072]

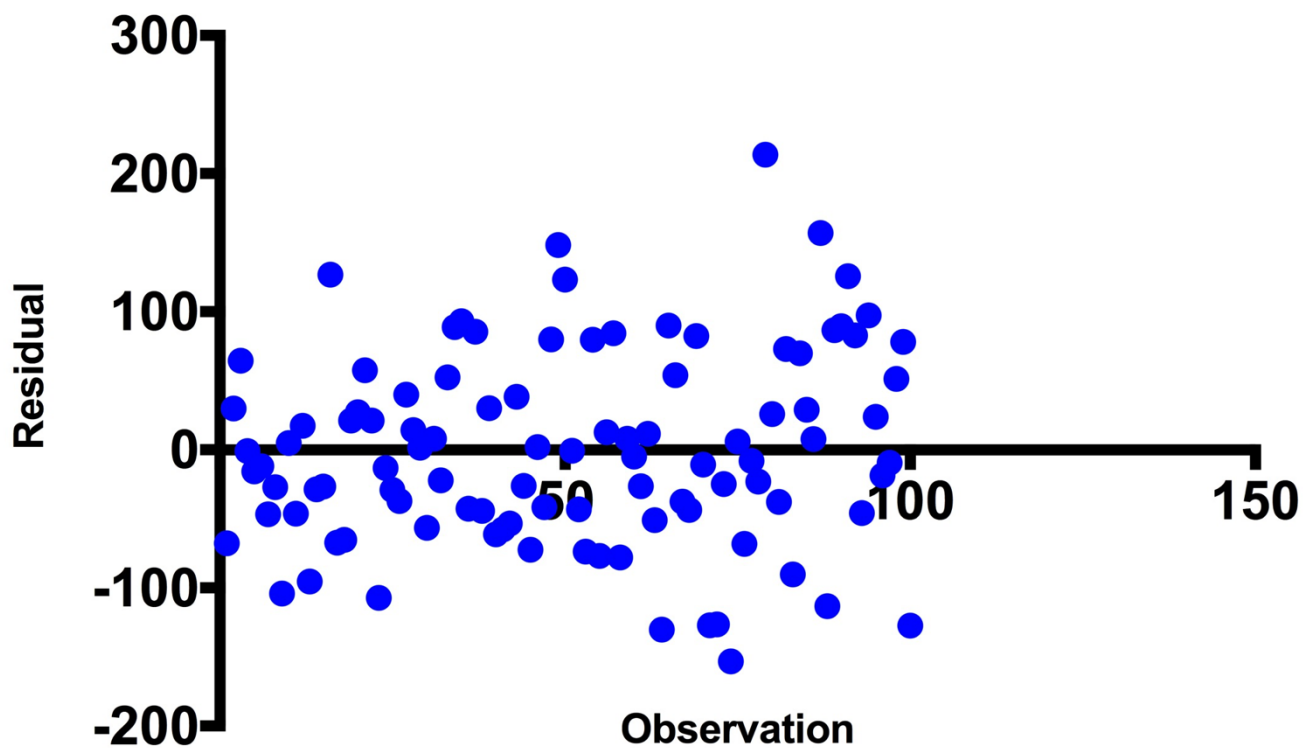

**Distribution of Residuals**
